# Supplementary material for: Klf4 methylated by Prmt1 restrains the commitment of primitive endoderm
Source: PubMed Central journal article supplement (PMC8887470; doi:10.1093/nar/gkac054), 2022-02-07
Supplement: gkac054_supplemental_file.pdf [file gkac054_supplemental_file.pdf]

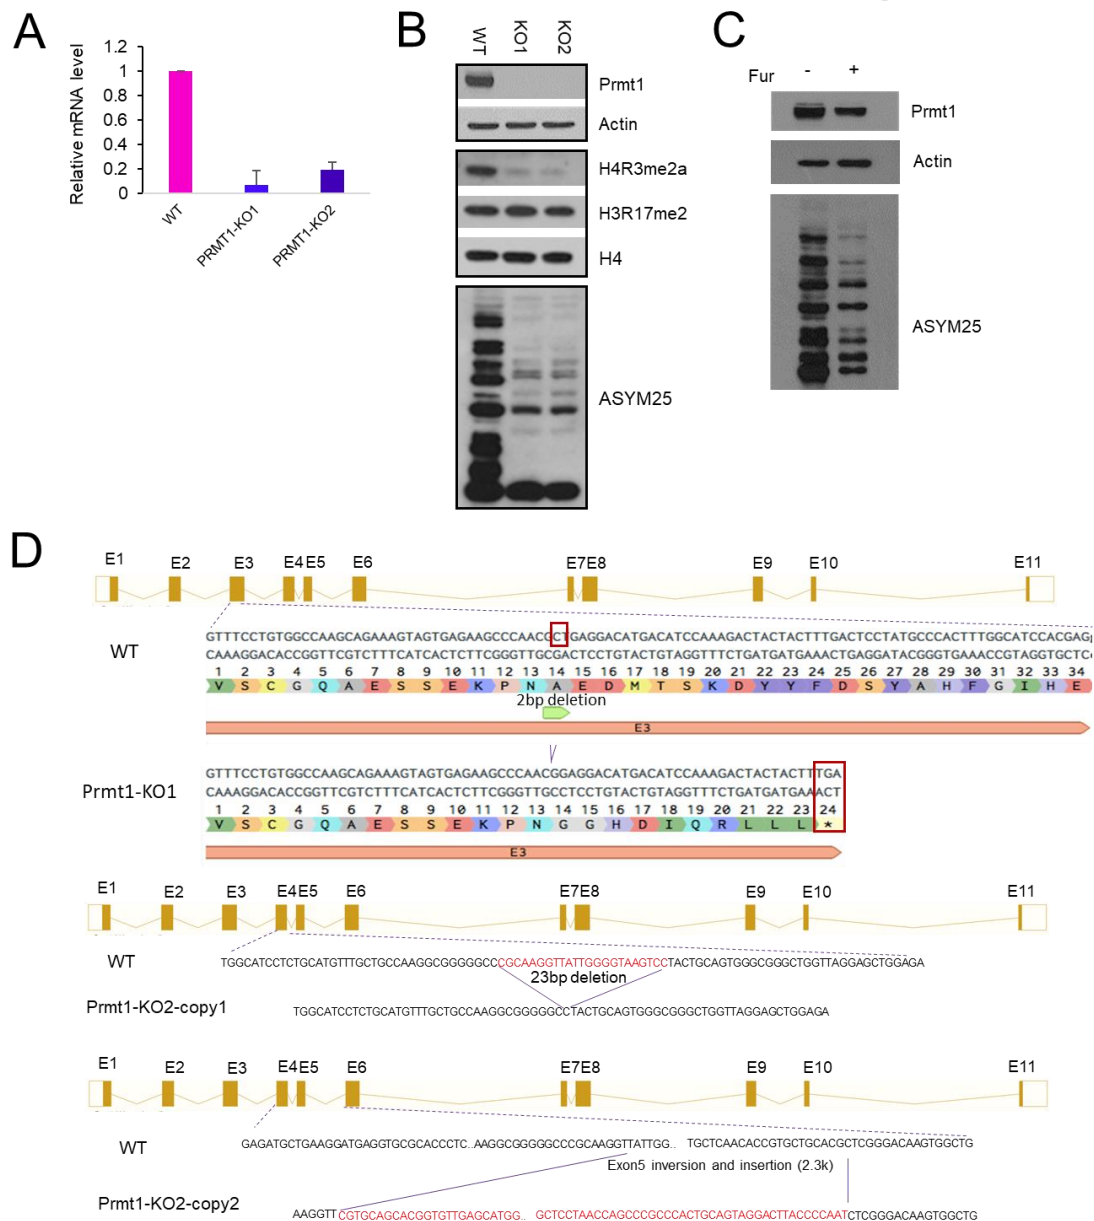

**Figure S1. The effect of Prmt1-KO cells.**

(A) The mRNA levels of Prmt1 decreased in Prmt1-KO cells. (B) Western blotting with anti-Prmt1, anti-Actin, anti-H4R3me2a, anti-H3R17me, anti-H4, and anti-ASYM25 in E14 ES cells (WT) and Prmt1 KO cells. (C) Western blotting with anti-Prmt1, anti-Actin, and anti-ASYM25 in Fur treated (+) or untreated (-) E14 cells. (D) The disruption of the Prmt1 genomic sequence within the knockout cell lines (KO1 and KO2).

Figure S2

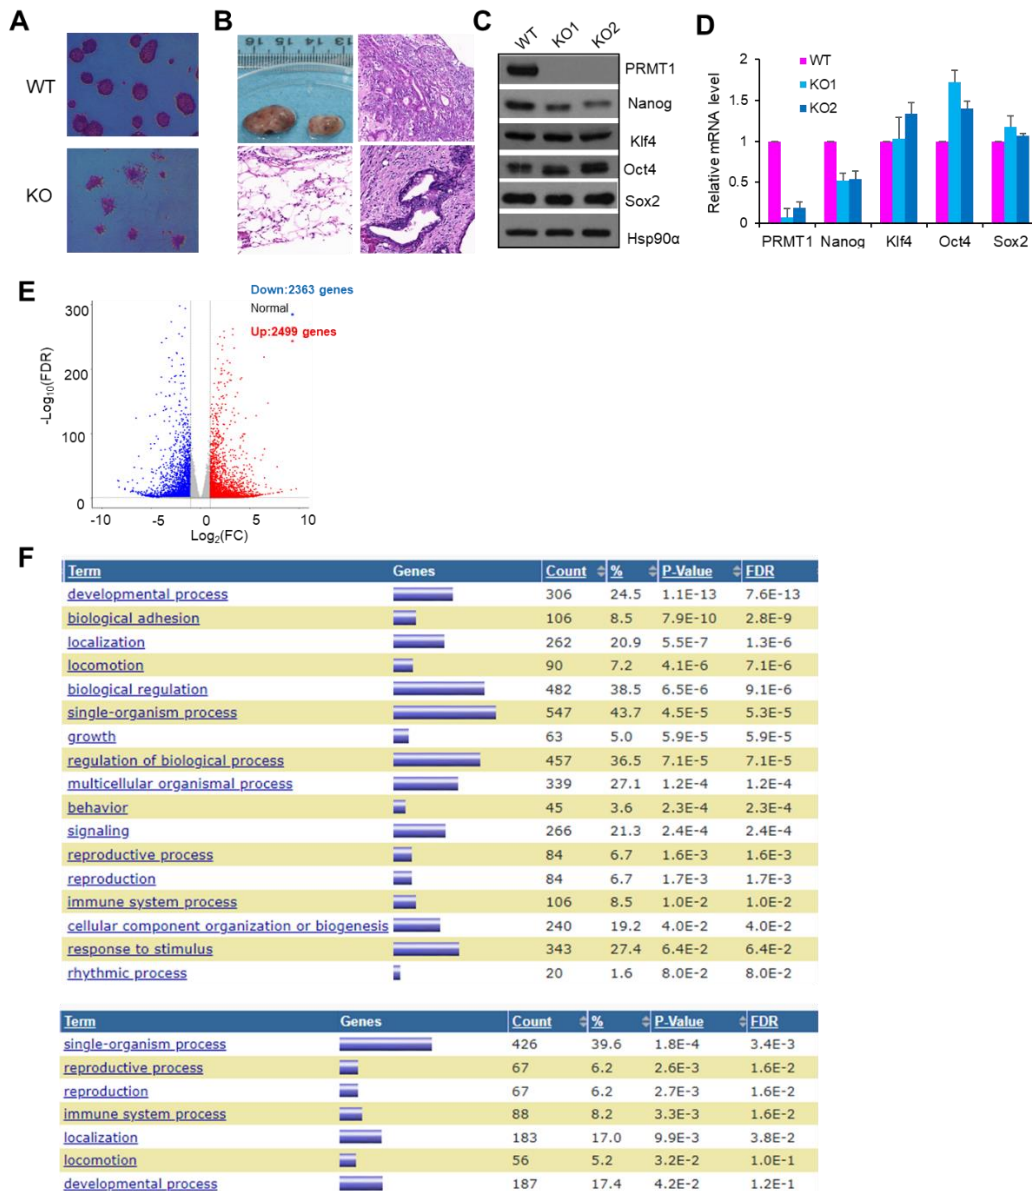

**Figure S2. RNA-seq analysis of WT and Prmt1-KO cells.**

(A) Alkaline phosphatase staining of WT and Prmt1 KO cells. (B) Hematoxylin and eosin staining of teratoma derived from PRMT1 KO mESCs. (C and D) Expression of the indicated genes by using Western blot (C) and RT-qPCR (D). (E) Differential genes expression analysis of bulk RNA-seq data of WT and Prmt1-KO cells. (F) Enriched GO terms from DAVID 6.8 for Prmt1 upregulated genes (upper panels) and downregulated genes (lower panels) according to the bulk RNA-Seq data of WT and Prmt1 KO cells.

Figure S3

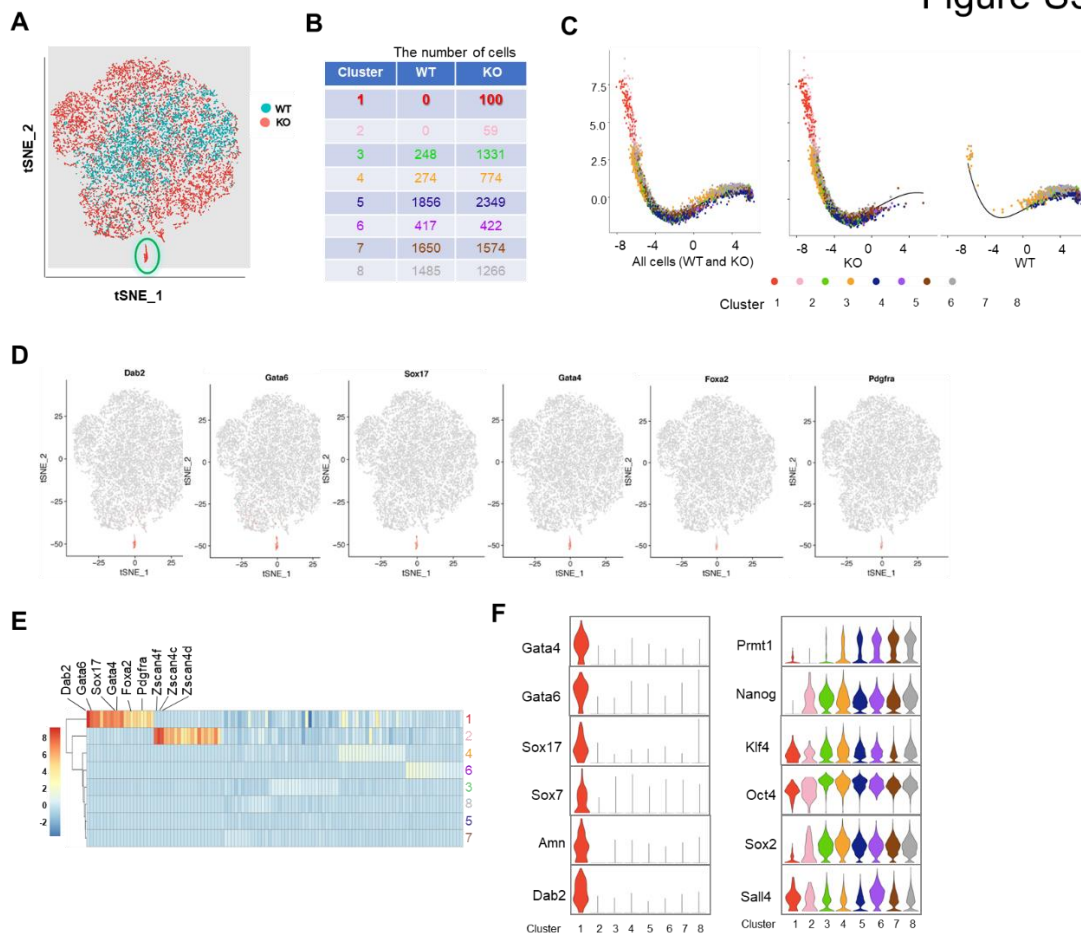

**Figure S3. The analysis of sc-RNA seq.**

(A) tSNE of 13,805 cells by scRNA-seq, include 5930 WT cells and 7875 Prmt1 KO cells which is related in Figure 4D. (B) Eight transcriptionally distinct clusters were identified (clusters 1-8) by unsupervised classification. Number and origin of cells in each cluster. (C) Principal component analysis (PCA) based on pseudotime showed that cluster 1 was distant from the other clusters. (D) Heatmap displaying the expression of marker genes in each cluster. (E) Cluster 1 and 2 are marked with indicated PrE genes and 2C-like genes. (F) Violin map showed that PrE genes are significantly and specifically high expression in cluster 1.

# Figure S4

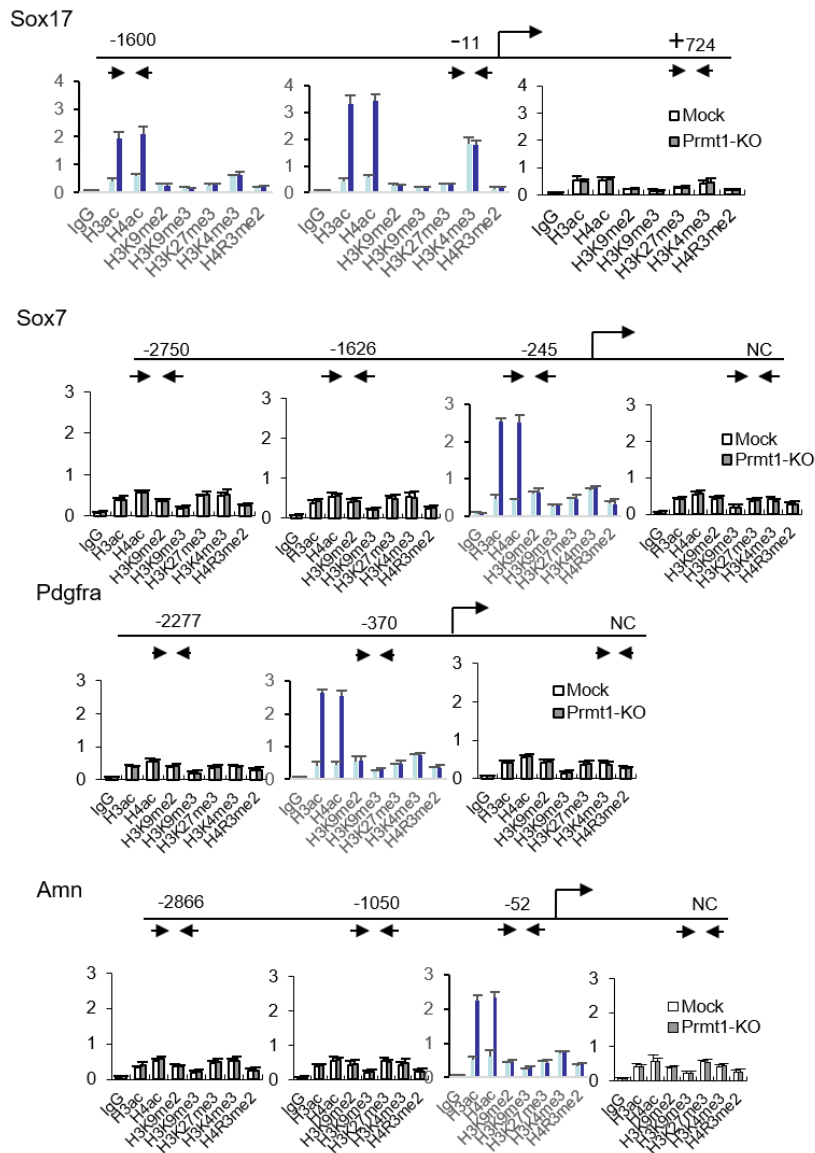

**Figure S4. ChIP-qPCR analysis of histone modifications in upstream region of other PrE genes (Sox17, Sox7, Pdgfra, and Amn) in WT and Prmt1-KO cells.**

## Figure S5

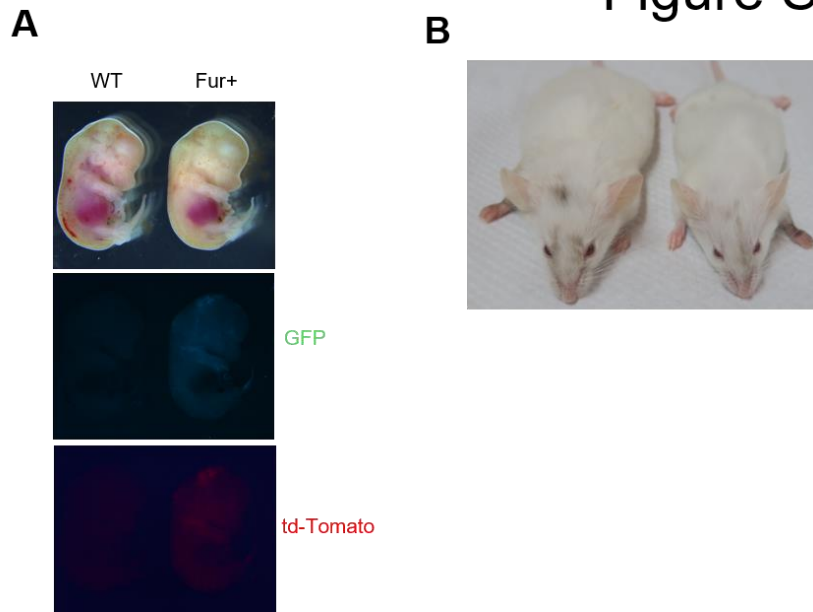

**Figure S5. The chimeric embryos at E12.5 (A) and mice after birth (B) showed that the Fur-treated ES cells.**

**Table S1. The potential off-targeting locus were amplified by PCR and then sequenced, showing no mutant.**

| off target sequence          | loci in genome      | forward primer sequence      | loci in genome      | reverse primer sequence     | loci in genome      | length | Mutant |
|------------------------------|---------------------|------------------------------|---------------------|-----------------------------|---------------------|--------|--------|
| TAGTTAGAACCCCAAC<br>ACTGAGG  | chr6:+67353<br>807  | CCAACCCTGCTCAACC<br>ATCT     | chr6:+67353<br>436  | AGCTTCATTACCCCA<br>GCACC    | chr6:+67354<br>003  | 567    | None   |
| TAGTGAGAAGCCTAAC<br>ACTGAGG  | chr18:+4484<br>501  | GTGGCCTTGCAAATCA<br>GCTC     | chr18:+4484<br>239  | CCTACTCCACCTTGC<br>CCTTG    | chr18:+4484<br>832  | 593    | None   |
| TAGGGAGAAACCCATC<br>GCTGCAG  | chr16:-<br>72356018 | TAAAAACCCATGGCAC<br>TCCC     | chr16:-<br>72356290 | CATGTGCCCTTTTCC<br>GTCC     | chr16:-<br>72355895 | 395    | None   |
| CAGTAAGTAGCCCAAC<br>TCTGAGG  | chr3:+65369<br>957  | TCCTCCTGTTACCCTC<br>CCTG     | chr3:+65369<br>659  | GAACACTCACGGCTT<br>CCTCA    | chr3:+65370<br>340  | 681    | None   |
| GGCTGAGAAGCCCAA<br>CTCTGTAG  | chr12:+5140<br>528  | GCTTACTCTGGTCACA<br>ACGC     | chr12:+5140<br>288  | AGCAGAAGTGTGCGC<br>TAGG     | chr12:+5140<br>743  | 455    | None   |
| CACTAAGAAGCCCAAC<br>TCTGAGG  | chr1:-<br>5090179   | TCAGAACCAAGCAGAG<br>CAGAG    | chr1:-<br>5090364   | TGCGCCTCAGAGATG<br>AGTTG    | chr1:-<br>5090019   | 345    | None   |
| TTGACAGAAGCCCAAC<br>CCTGCAG  | chr7:-<br>90034818  | TCAGCCACATGAGATG<br>CTGT     | chr7:-<br>90035173  | GAATCCAAGGTGTGA<br>TGTGCT   | chr7:-<br>90034415  | 758    | None   |
| TAGTAAGAAGCTCAAC<br>ACTGTAG  | chr18:-<br>42730599 | TCACCGCAGAGGTTTC<br>GTC      | chr18:-<br>42730825 | CGTGCAGAGTAGTG<br>TCCTATC   | chr18:-<br>42730457 | 368    | None   |
| TAATGAGCACCCCAAC<br>ACTGGGG  | chr8:-<br>118620357 | CCCAGGTGAGAGTA<br>GGTGA      | chr8:-<br>118620653 | CCTCCAGAGCCTCAC<br>AATCC    | chr8:-<br>118620141 | 512    | None   |
| TAGGCAGAATCCCAAC<br>ACTGAAG  | chr13:-<br>72369346 | AGCATGCCTACAACAC<br>TCCC     | chr13:-<br>72369419 | GGCACTAGTCCCCT<br>AAGGA     | chr13:-<br>72369067 | 352    | None   |
| CTGGGGGGCTCAAGG<br>TTATTAGG  | chr13:-<br>29104435 | GATAACCTGCTGGTAG<br>GGAGC    | chr13:-<br>29104571 | CACAACGTGGAGTAG<br>GAGGTC   | chr13:-<br>29104238 | 333    | None   |
| CAGGGGCCACAAGT<br>TTATTGGG   | chr1:+18698<br>616  | TCTATGGGTAATGGGC<br>CAGATG   | chr1:+18698<br>447  | CACATATAGGGTGGC<br>CCAGT    | chr1:+18698<br>889  | 442    | None   |
| CTGGAGCCCAAGG<br>TTAGTCAG    | chr16:+2844<br>5427 | CGGATCAAGGAGCTG<br>GCTAT     | chr16:+2844<br>5244 | GGACACCTTACAACG<br>CTTGC    | chr16:+2844<br>5712 | 468    | None   |
| CGGGAGCTCTCAAGG<br>TTAGTCAG  | chr11:+7187<br>9950 | TGCCAATCTGCCCCAC<br>TTAG     | chr11:+7187<br>9708 | TGAGGAGCTGCAACA<br>AGGAG    | chr11:+7188<br>0138 | 430    | None   |
| AGAGGGCCAGCAAGG<br>TTACTCAG  | chr5:-<br>107733643 | ACGGGTAACATAGGG<br>AAAGACAA  | chr5:-<br>107733720 | GGGGGCTGCTCATAT<br>CATGG    | chr5:-<br>107733518 | 202    | None   |
| CGGGAGCAAGCAAGG<br>TTCTTGAG  | chr6:+14463<br>2967 | AAGGCATGAAAAGTAG<br>AAAAAGCC | chr6:+14463<br>2835 | CGCCTCACACTTCCA<br>TGACA    | chr6:+14463<br>3100 | 265    | None   |
| CAAGGGCCAGCAAGG<br>GTATTGGG  | chr4:-<br>150681700 | AACACATCCCACATCC<br>CGAG     | chr4:-<br>150681797 | CTTAAGCGGTGCTCT<br>GGGC     | chr4:-<br>150681298 | 499    | None   |
| CGGCCGCCGCAAGC<br>TGATTGAG   | chr5:+11917<br>1445 | AGGGCATGAAGTGTA<br>GTGCTC    | chr5:+11917<br>1297 | CACGAAAGCCGAAGG<br>GTAGA    | chr5:+11917<br>1807 | 510    | None   |
| CGGGGGCCGAAAAGG<br>TCAGTGAG  | chr17:+3602<br>3172 | TTGAGGCTGCCTGTGA<br>GATG     | chr17:+3602<br>3040 | TGTCTGCAGCATCCG<br>AAACT    | chr17:+3602<br>3492 | 452    | None   |
| CTGGGGCTGCAAGG<br>CCATTAGG   | chr4:-<br>136242201 | GAACGTGTGTGAGGC<br>AGAGA     | chr4:-<br>136242509 | CTCCGAGGTTGCAT<br>GAGGT     | chr4:-<br>136241899 | 610    | None   |
| TACAGCATAATCAGAG<br>ATACTGG  | chr18:-<br>4484742  | TCCCACCAGTGGATT<br>TGTAGT    | chr18:-<br>4485010  | TACACAGCCTCACGT<br>ACTGC    | chr18:-<br>4484573  | 437    | None   |
| AATGGCATAATCGGAG<br>ATACTGG  | chr2:+13769<br>5802 | GGAAGTAGCCAGCCC<br>ATTGT     | chr2:+13769<br>5455 | TTTTCTGACCCCCAC<br>CACAC    | chr2:+13769<br>6079 | 624    | None   |
| CACACATAATCGTAG<br>ATACAGG   | chr13:-<br>72278554 | TCAGGCCCTTAGGCTC<br>TTCT     | chr13:-<br>72278723 | GGCCTGCCAGTAGGA<br>TGTTT    | chr13:-<br>72278151 | 572    | None   |
| AGCAGCAAAATGGGA<br>GATACTGG  | chr2:-<br>135266227 | AATTGCTGCGCTGTAG<br>ACAT     | chr2:-<br>135266332 | GATGAAGCCTCGTTG<br>CCTTT    | chr2:-<br>135265984 | 348    | None   |
| TAAGGCATAATCGGAG<br>ATTCAGG  | chr7:-<br>90200445  | AAAGAAAGATGCCCC<br>CAAG      | chr7:-<br>90200372  | GGCCAGGCTACATAG<br>CAAAC    | chr7:-<br>90199975  | 397    | None   |
| CATAGCACAAGGGGA<br>GATACAAG  | chr1:+75136<br>224  | CCACATCTGCAGAGA<br>AGCA      | chr1:+75136<br>041  | GTCCTATTCGCCGAC<br>TCCAG    | chr1:+75136<br>439  | 398    | None   |
| CAGAGCAGAAACGGGA<br>GATAAAAG | chr17:+9441<br>2138 | AACTGCGTGCAATGTG<br>GTGA     | chr17:+9441<br>1914 | ATGTACTCGCATGTC<br>CTTGAT   | chr17:+9441<br>2446 | 532    | None   |
| CACAACATACTTGAG<br>ATAGAGG   | chr6:-<br>73676517  | GCAGTCTCCATTTTCT<br>CCCTGA   | chr6:-<br>73676729  | ACAACCGTTCATAAG<br>GCATCTCT | chr6:-<br>73676189  | 540    | None   |
| TAGAGCATAATAGGAG<br>ATCCAAG  | chrX:+4511<br>2271  | TGACTCTGTTCTCGGC<br>CATT     | chrX:+4511<br>1894  | ATGCTCTATTCGTGC<br>CCTTG    | chrX:+4511<br>2279  | 385    | None   |
| TACAGTATAAATGGAG<br>ATACGGG  | chr6:+53109<br>111  | CGCAGTGATGAGCA<br>GGCTA      | chr6:+53108<br>863  | TTTCTGGACAGGGC<br>AATCC     | chr6:+53109<br>475  | 612    | None   |
| CCTCACCTACTGCAC<br>GCTCAAG   | chr1:-<br>94406823  | TGGGAGTGATGGCTT<br>GTGAC     | chr1:-<br>94407114  | GCTTTCTCACCCCTA<br>ACCCC    | chr1:-<br>94406601  | 513    | None   |
| CATCACCTTGCTGCAC<br>GCCCAAG  | chr2:-<br>89400838  | GGCCTTAGCGGGAAA<br>AATAC     | chr2:-<br>89400958  | ATGCTCTCAAGGGG<br>AGTTT     | chr2:-<br>89400577  | 381    | None   |
| GAACACGGTGTGCA<br>CGGCCTGG   | chr5:-<br>115084687 | CGGCACATCGTCAACT<br>ACCT     | chr5:-<br>115084758 | ATGAGAGGCGAAAGG<br>CCATC    | chr5:-<br>115084525 | 233    | None   |
| CGAGGCCGTGCCGCA<br>CGCTCGGG  | chr4:+86503<br>161  | GAACCTTAGGGACCCA<br>AGCC     | chr4:+86502<br>788  | AACCGCCTCTCCAT<br>AGTCT     | chr4:+86503<br>394  | 606    | None   |
| CTGCACCATGCGGCA<br>CGCTCCAG  | chr2:-<br>135771092 | CAGGCCCTGGTTCTGG<br>AGAG     | chr2:-<br>135771199 | TCCTTTTTCCCGTTG<br>CCAT     | chr2:-<br>135770745 | 454    | None   |
| CACCCCTGCTGCAC<br>GCACAGG    | chr13:-<br>96588299 | CATCTAGCCACCCCGT<br>TGTT     | chr13:-<br>96588524 | TCCCTCTGCTTCCTA<br>GCACT    | chr13:-<br>96588040 | 484    | None   |

|                             |                      |                           |                      |                             |                      |     |      |
|-----------------------------|----------------------|---------------------------|----------------------|-----------------------------|----------------------|-----|------|
| CTACACCCGCTGCAC<br>GCTGCAG  | chr1:-<br>54820537   | GCCACCACCTTTGCTA<br>CATCT | chr1:-<br>54820871   | CACTTCAGAGCAGAA<br>GAAAACCC | chr1:-<br>54820392   | 479 | None |
| TAAACAGTGCTGCAC<br>TCTCAGG  | chr1:+33537<br>592   | AGGCAGGGATCTTGTA<br>GGACT | chr1:+33537<br>315   | ACGTTGTTACCGCT<br>CTGATT    | chr1:+33537<br>827   | 512 | None |
| CAAGACCCTGGGGCA<br>CGCTCAGG | chr13:+1035<br>95202 | GGCCTGGGTTAGGGT<br>AAACA  | chr13:+1035<br>94932 | TGAGTAGAGGCGGTT<br>TCCTC    | chr13:+1035<br>95506 | 574 | None |
| CATCACGGTCCTGCAC<br>TCTCAAG | chr6:-<br>3328399    | CTGGCTAGGGACTGG<br>TTGTG  | chr6:-<br>3328568    | CAGGGGTAGGACAAG<br>GAGGA    | chr6:-<br>3328101    | 467 | None |

**Table S2. Primers for RT-qPCR and constructions.**

| <b>Primers for RT-qPCR</b>       |                                            |
|----------------------------------|--------------------------------------------|
| mKlf4-qPCR-F1                    | GTGCCCGACTAACCGTTG                         |
| mKlf4-qPCR-R1                    | GTCGTTGAACTCCTCGGTCT                       |
| mOct4-qPCR-F                     | ATCACTCACATCGCCAATCA                       |
| mOct4-qPCR-R                     | CCTGGGAAAGGTGTCCTGTA                       |
| mSox2-qPCR-F                     | ATGATGGAGACGGAGCTGAA                       |
| mSox2-qPCR-R                     | TTGCTGATCTCCGAGTTGTG                       |
| mNanog-qPCR-F                    | ACCTGAGCTATAAGCAGGTTAAGAC                  |
| mNanog-qPCR-R                    | GTGCTGAGCCCTTCTGAATCAGAC                   |
| mGata4-qPCR-F                    | CGCCGCCTGTCCGCTTCC                         |
| mGata4-qPCR-R                    | TTGGGCTTCCGTTTTCTGGTTTGA                   |
| mGata6-qPCR-F                    | TGCCTCGACCACTTGCTATGAAAA                   |
| mGata6-qPCR-R                    | CACTGATGCCCTACCCCTGAG                      |
| mSox17-qPCR-F                    | GGAGGGTCACCACTGCTTTA                       |
| mSox17-qPCR-R                    | AGATGTCTGGAGGTGCTGCT                       |
| mActb(62-81)-qPCR-F              | TCTTTGCAGCTCCTTCGTTG                       |
| mActb(193-212)-qPCR-R            | ACGATGGAGGGGAATACAGC                       |
| <b>Primers for cloning</b>       |                                            |
| mKlf4-F-(EcoRI)                  | <u>CG GAATTC GCCACC</u> ATGAGGCAGCCA       |
| mKlf4-R-(XhoI)                   | CCGCTCGAG AAGTGCCTCTTCATGTGTAAGGC          |
| mKlf4-R-(Sall)                   | <u>ACGCGTCGAC</u> AAAGTGCCTCTTCATGTGTAAGGC |
| mKlf4-F-(BamHI)                  | <u>CG GGATCC</u> ATGAGGCAGCCACCTGGCGA      |
| mPrmt1-F                         | <u>CG GAATTCGCCACC</u> ATGGCGCAGCCGAGGC    |
| mPrmt1-R-(XhoI)                  | <u>CCGCTCGAG</u> CGCATCCGGTAGTCGGTGG       |
| mPrmt1-R-(Sall)                  | <u>ACGCGTCGAC</u> CGCATCCGGTAGTCGGTGG      |
| <b>Primers for site mutation</b> |                                            |
| mKlf4-R387K-F                    | GAGCCCAAGCCAAAGAAGGGGAAGAAGGTCGTGG         |
| mKlf4-R387K-R                    | CCACGACCTTCTTCCCTTTTGGCTTGGGCTC            |
| mKlf4-R389K-F                    | AAGCCAAAGAGGGGAAAAAGGTCGTGGCCCCGG          |
| mKlf4-R389K-R                    | CCGGGGCCACGACCTTTTTCCCTCTTTGGCTT           |
| mKlf4-R390K-F                    | CCAAAGAGGGGAAGAAAGTCGTGGCCCCGGAAA          |
| mKlf4-R390K-R                    | TTCCGGGGCCACGACTTCTTCCCTCTTTGG             |
| mKlf4-R394K-F                    | AGAAGGTCGTGGCCAAAGAAAAGAACAGCCACC          |
| mKlf4-R394K-R                    | GGTGGCTGTCTTTTCTTGGGCCACGACCTTCT           |
| mKlf4-R396K-F                    | TCGTGGCCCCGAAAAAACAGCCACCCACACT            |
| mKlf4-R396K-R                    | AGTGTGGGTGGCTGTTTTTTCCGGGGCCACGA           |
| mKlf4-R387A-F                    | GAGCCCAAGCCAAAGGCGGGGAAGAAGGTCGTGG         |
| mKlf4-R387A-R                    | CCACGACCTTCTTCCCGCTTTGGCTTGGGCTC           |
| mKlf4-R389A-F                    | AAGCCAAAGAGGGGAGCAAGGTCGTGGCCCCGG          |
| mKlf4-R389A-R                    | CCGGGGCCACGACCTTGCTCCCTCTTTGGCTT           |
| mKlf4-R390A-F                    | CCAAAGAGGGGAAGAGCGTCGTGGCCCCGGAAA          |



|                                     |                                                   |
|-------------------------------------|---------------------------------------------------|
| mKlf4-R390A-R                       | TTTCCGGGGCCACGACGCTCTTCCCCTTTTGG                  |
| mKlf4-R394A-F                       | AGAAGGTCGTGGCCCGCGAAAAGAACAGCCACC                 |
| mKlf4-R394A-R                       | GGTGGCTGTTCTTTTCGCGGGCCACGACCTTCT                 |
| mKlf4-R396A-F                       | TCGTGGCCCCGAAAAGCAACAGCCACCCACACT                 |
| mKlf4-R396A-R                       | AGTGTGGGTGGCTGTTGCTTTCCGGGGCCACGA                 |
| mKlf4-R394,396A-F                   | AGAAGGTCGTGGCCC GCGAAA GCAACAGCCACCCACACT         |
| mKlf4-R394,396A-R                   | AGTGTGGGTGGCTGTTGCTTTTCGCGGGCCACGACCTTCT          |
| mKlf4-R394,396K-F                   | AGAAGGTCGTGGCCC AAGAAA AAGACAGCCACCCACACT         |
| mKlf4-R394,396K-R                   | AGTGTGGGTGGCTGTTCTTTTCTTGGGCCACGACCTTCT           |
| mKlf4-R394,396F-F                   | AGAAGGTCGTGGCCC TCAAAA TTCACAGCCACCCACACT         |
| mKlf4-R394,396F-R                   | AGTGTGGGTGGCTGTGAATTTGAAGGGCCACGACCTTCT           |
| mKlf4-R387,389K-F                   | GAGCCCAAGCCAAAGAAGGGAAAAAAGTCGTGGCCCCGG           |
| mKlf4-R387,389K-R                   | CCGGGGCCAC GACCTTTTTC CCTTCTTTGG CTTGGGCTC        |
| mKlf4-R389,390K-F                   | AAGCCAAAGAGGGGAAAAAAGTCGTGGCCCCGGAAA              |
| mKlf4-R389,390K-R                   | TTTCCGGGGC CACGACTTTT TCCCCTCTT TGGCTT            |
| mKlf4-R387,389,390K-F               | GAGCCCAAGCCAAAG AAGGGAAAAAAG TCGTGGCCCCGGAAA      |
| mKlf4-R387,389,390K-R               | TTTCCGGGGC CACGA CTTT TCCCCTCTT TGGCTTGGGC TC     |
| mKlf4-R387,389,390A-F               | GAGCCCAAGCCAAAG GCGGGAGCAGCG TCGTGGCCCCGGAAA      |
| mKlf4-R387,389,390A-R               | TTTCCGGGGC CACGA CGCTG CTCCCGCCTT TGGCTTGGGC TC   |
| mKlf4-R387,389,390F-F               | GAGCCCAAGCCAAAG TTCGGATTCTC TCGTGGCCCCGGAAA       |
| mKlf4-R387,389,390F-R               | TTTCCGGGGC CACGA GAAGAA TCC GAA CTTT GGCTTGGGC TC |
| mKlf4-R387,389,390,394,396A-F       | <b>GCAGCGTCGTGGCCCGCGAAAAGCAACAGCCACCCACACT</b>   |
| mKlf4-R387,389,390,394,396A-R       | AGTGTGGGTG GCTGTTGCTT TCGCGGGCCA CGACGCTGC        |
| mKlf4-R387,389,390,394,396K-F       | <b>AAAAAGTCGTGGCCCAAGAAAAAACAGCCACCCACACT</b>     |
| mKlf4-R387,389,390,394,396K-R       | AGTGTGGGTG GCTGTTTTT TCTTGGGCCA CGACTTTTT         |
| <b>Primers for Klf4 truncations</b> |                                                   |
| mKlf4(1-157)-F                      | CGCGGATCCATGAGGCAGCCACCTGGCGAG                    |
| mKlf4(1-157)-R                      | CCGCTCGAGTTACGGGTCACCCCGGCCCGGAT                  |
| mKlf4(1-184)-F                      | CGCGGATCCATGAGGCAGCCACCTGGCGAG                    |
| mKlf4(1-184)-R                      | CCGCTCGAGCAGGTTGAAGGGGGCCGTG                      |
| mKlf4(1-400)-F                      | CGCGGATCCATGAGGCAGCCACCTGGCGAG                    |
| mKlf4(1-400)-R                      | CCGCTCGAGTTAGTGGGTGGCTGTTCTTTT                    |
| mKlf4(1-425)-F                      | CGCGGATCCATGAGGCAGCCACCTGGCGAG                    |
| mKlf4(1-425)-R                      | CCGCTCGAGTTATGTGTGAGTTCGCAGGTG                    |
| mKlf4(158-385)-F                    | CGCGGATCCGCGTGGCTGCCAGCAACACA                     |
| mKlf4(158-385)-R                    | CCGCTCGAGTTATGGCTTGGGCTCCTCTGGCAG                 |
| mKlf4(463-483)-F                    | CGCGGATCCGACCTGGCGGCGACGGTGGCC                    |
| mKlf4(463-483)-R                    | CCGCTCGAGTAAAAGTGCCTCTTCATGTG                     |
| mKlf4(117-483)-F                    | CGCGGATCCGTGGCCGCCACCGTGACCACC                    |
| mKlf4(117-483)-R                    | CCGCTCGAGTAAAAGTGCCTCTTCATGTG                     |
| mKlf4(158-483)-F                    | CGCGGATCCGCGTGGCTGCCAGCAACACA                     |
| mKlf4(158-483)-R                    | CCGCTCGAGTAAAAGTGCCTCTTCATGTG                     |
| mKlf4(185-483)-F                    | CGCGGATCCGCGGACATCAATGACGTGAGC                    |

|                  |                                 |
|------------------|---------------------------------|
| mKlf4(185-483)-R | CCGCTCGAGTAAAAAGTGCCTCTTCATGTG  |
| mKlf4(386-483)-F | CGCGGATCCAAGAGGGGAAGAAGGTCTGTGG |
| mKlf4(386-483)-R | CCGCTCGAGTAAAAAGTGCCTCTTCATGTG  |

**Table S3. Primers for CHIP qPCR assay**

|                          | Sequence (5'-3')         |
|--------------------------|--------------------------|
| Gata4 (-541/-337)-F      | CGGCTCGTGGGAAGGAGAA      |
| Gata4 (-541/-337)-R      | CGGCTCGTGGGAAGGAGAA      |
| Gata4 (+8050/+8187)-F    | TCGGAGAAGAGTGAGCAG       |
| Gata4 (+8050/+8187)-R    | GTGACAGCCATAGCCAAA       |
| Gata6 (-556/-349)-F      | TCTCCGAGTTATCACAGCG      |
| Gata6 (-556/-349)-R      | GAGCAGGAAGAATGACAGG      |
| Gata6 (+675/+820)-F      | CCCATCTCGTCTTCGTCC       |
| Gata6 (+675/+820)-R      | TGCGAGGCGTAGGGGCTGA      |
| Sox17 v1 (-219/-4)-F     | CAGTTTACTTCTGCTTCG       |
| Sox17 v1 ((-219/-4)-R    | GCTGAGAACGTCTGACCC       |
| Sox17 v1 (+2976/+3104)-F | AGGCTAACAGTCTTACACGC     |
| Sox17 v1 (+2976/+3104)-R | TTCCATCGCAAACACCAC       |
| Sox17 v2 (-36/+179)-F    | GGCAGGTGTAGCCAGAAC       |
| Sox17 v2 (-36/+179)-R    | CCTAACCTTCGCCTAAT        |
| Sox17 v2 (+724/+906)-F   | ACTCAATCCCTTCTTCCAGC     |
| Sox17 v2 (+724/+906)-R   | CCTCCCTTACCTTTCTCCC      |
| Sox7 (-245/-58)-F        | ACCTGCACCGGAGCGGGATC     |
| Sox7 (-245/-58)-R        | TATCAGCTTCGGGCCACC       |
| Sox7 (+2796/+3029)-F     | ATGCCTCGTCTCTTCAC        |
| Sox7 (+2796/+3029)-R     | TCTATTCACCATACCCTACCA    |
| Pdgfra (-440/-273)-F     | GTCCAGACAGGTGATCGGTGGTGC |
| Pdgfra (-440/-273)-R     | GGGGCTGGGCTTCTTCCTGGT    |
| Pdgfra (+1216/+1319)-F   | AAAGTGTTGAGGCTGCTGTGA    |
| Pdgfra (+1216/+1319)-R   | GCCCGAAGAGTTTCTGGTTTA    |
| Amn (-1147 -892)-F       | CAACCCACCAACCAAAC        |
| Amn (-1147 -892)-R       | GGAAACAGACAGTAGATGAGGC   |
| Amn (-157/+97)-F         | AGGGCAGATGCTAAAGCC       |
| Amn (-157/+97)-R         | CAGCCTCAATCAAGGTCCAG     |
| Amn (+560 /+745)-F       | GGCGACACTCAGCCTTCCT      |
| Amn (+560 /+745)-R       | CCCACCTCCAGTTCATCCC      |
